# Supplementary material
Source: PubMed Central journal article supplement (PMC10174381)
Supplement: medi-102-e33716-s001.pdf [file medi-102-e33716-s001.pdf]

**Supplementary Table 2. Survey response distribution of bronchiectasis patients according to COVID-19 history by sex**

|                               |              | All<br>(n=123) | COVID-19 (-)<br>(n=99) | COVID-19 (+)<br>(n=24) | <i>p</i> value     |
|-------------------------------|--------------|----------------|------------------------|------------------------|--------------------|
| <b>MARS, total mean score</b> |              |                |                        |                        |                    |
| Female                        |              | 23.2 ± 3.0     | 23.3 ± 3.0             | 22.8 ± 2.9             | 0.563 <sup>a</sup> |
| Male                          |              | 21.6 ± 6.0     | 21.0 ± 6.2             | 23.1 ± 5.4             | 0.060 <sup>a</sup> |
| <b>MARS, total score</b>      |              |                |                        |                        |                    |
| Female                        | ≤20          | 8 (10.5)       | 6 (9.1)                | 2 (20)                 | 0.282 <sup>c</sup> |
|                               | >20          | 68 (89.5)      | 60 (90.9)              | 8 (80)                 |                    |
| Male                          | ≤20          | 9 (19.1)       | 8 (24.2)               | 1 (7.1)                | 0.173 <sup>b</sup> |
|                               | >20          | 38 (80.9)      | 25 (75.8)              | 13 (92.9)              |                    |
| <b>Beck Anxiety Scale</b>     |              |                |                        |                        |                    |
| Female                        | 0-7 point(s) | 33 (43.4)      | 29 (43.9)              | 4 (40)                 | 0.185 <sup>c</sup> |
|                               | Mild         | 19 (25)        | 14 (21.2)              | 5 (50)                 |                    |
|                               | Moderate     | 14 (18.4)      | 14 (21.2)              | 0 (0)                  |                    |
|                               | Severe       | 10 (13.2)      | 9 (13.6)               | 1 (10)                 |                    |
| Male                          | 0-7 point(s) | 29 (61.7)      | 21 (63.6)              | 8 (57.1)               | 0.654 <sup>c</sup> |
|                               | Mild         | 12 (25.5)      | 7 (21.2)               | 5 (35.7)               |                    |
|                               | Moderate     | 3 (6.4)        | 3 (9.1)                | 0 (0)                  |                    |
|                               | Severe       | 3 (6.4)        | 2 (6.1)                | 1 (7.1)                |                    |
| <b>IES-R total mean score</b> |              |                |                        |                        |                    |
| Female                        |              | 15.6 ± 18.1    | 16.3 ± 18.5            | 11.0 ± 15.1            | 0.287 <sup>a</sup> |
| Male                          |              | 11.0 ± 13.5    | 12.2 ± 15.5            | 8.2 ± 6.0              | 0.896 <sup>a</sup> |

<sup>a</sup> Mann Whitney U test <sup>b</sup> Chi-square test <sup>c</sup> Fisher Exact test

MARS: Medical Adherence Report Scale-5

IES-R: Impact of Event Scale – Revised
