# Supplementary material
Source: PubMed Central journal article supplement (PMC10174381)
Supplement: medi-102-e33716-s002.pdf [file medi-102-e33716-s002.pdf]

**Supplementary Table 1: Disease course of Bronchiectasis patients during COVID-19 pandemics**

|                                             | All<br>(n=123) | COVID-19<br>(-)<br>(n=99) | COVID-19<br>(+)<br>(n=24) | <i>p</i> value     |
|---------------------------------------------|----------------|---------------------------|---------------------------|--------------------|
| Increased bronchiectasis symptoms?          |                |                           |                           | 0.806 <sup>a</sup> |
| No                                          | 69 (56.1)      | 55 (55.6)                 | 14 (58.3)                 |                    |
| Yes                                         | 54 (43.9)      | 44 (44.4)                 | 10 (41.7)                 |                    |
| Number of exacerbations                     | 1.8 ± 2.1      | 1.8 ± 1.9                 | 2 ± 2.9                   | 0.647 <sup>b</sup> |
| Hospital appointments?                      |                |                           |                           | 0.082 <sup>a</sup> |
| No                                          | 15 (27.8)      | 10 (22.7)                 | 5 (50)                    |                    |
| Yes                                         | 39 (72.2)      | 34 (77.3)                 | 5 (50)                    |                    |
| Admitted to their own physician?            |                |                           |                           | 0.631 <sup>c</sup> |
| No                                          | 23 (59)        | 21 (61.8)                 | 2 (40)                    |                    |
| Yes                                         | 16 (41)        | 13 (38.2)                 | 3 (60)                    |                    |
| Bronchiectasis treatment?***                |                |                           |                           | 0.131 <sup>a</sup> |
| No                                          | 65 (52.8)      | 49 (49.5)                 | 16 (66.7)                 |                    |
| Yes                                         | 58 (47.2)      | 50 (50.5)                 | 8 (33.3)                  |                    |
| Duration of bronchiectasis treatment***     | 9.3 ± 7.9      | 9.2 ± 8.3                 | 10.1 ± 4.7                | 0.365 <sup>b</sup> |
| Adherence to treatment during pandemic?**** |                |                           |                           | 1 <sup>c</sup>     |
| No                                          | 1 (1.7)        | 1 (2)                     | 0                         |                    |
| Yes                                         | 57 (98.3)      | 49 (98)                   | 8 (100)                   |                    |

|                                                         |            |           |           |                     |
|---------------------------------------------------------|------------|-----------|-----------|---------------------|
| Changes in treatment?***                                |            |           |           | 0.365 <sup>c</sup>  |
| No                                                      | 55 (94.8)  | 48 (96)   | 7 (87.5)  |                     |
| Yes                                                     | 3 (5.2)    | 2 (4)     | 1 (12.5)  |                     |
| COVID-19 (+) patients in close proximity?               |            |           |           | <0.001 <sup>a</sup> |
| No                                                      | 75 (61)    | 70 (70.7) | 5 (20.8)  |                     |
| Yes                                                     | 48 (39)    | 29 (29.3) | 19 (79.2) |                     |
| Hospital admission due to COVID in close proximity?**** |            |           |           | 0.486 <sup>a</sup>  |
| No                                                      | 38 (79.2)  | 22 (75.9) | 16 (84.2) |                     |
| Yes                                                     | 10 (20.8)  | 7 (24.1)  | 3 (15.8)  |                     |
| Influenza vaccine                                       |            |           |           | 0.794 <sup>a</sup>  |
| No                                                      | 74 (60.2)  | 59 (59.6) | 15 (62.5) |                     |
| Yes                                                     | 49 (39.8)  | 40 (40.4) | 9 (37.5)  |                     |
| Opinion on COVID-19 vaccine                             |            |           |           | 0.732 <sup>a</sup>  |
| Negative                                                | 13 (10.6)  | 10 (10.1) | 3 (12.5)  |                     |
| Positive                                                | 110 (89.4) | 89 (89.9) | 21 (87.5) |                     |
| Want to get COVID-19 vaccine?                           |            |           |           | 0.364 <sup>a</sup>  |
| No                                                      | 14 (11.4)  | 10 (10.1) | 4 (16.7)  |                     |
| Yes                                                     | 109 (88.6) | 89 (89.9) | 20 (83.3) |                     |

---

<sup>a</sup> Chi-square test <sup>b</sup> Mann Whitney U test <sup>c</sup> Fisher Exact test

\* Only patients with exacerbations were evaluated.

\*\* Only patients who admitted to a physician were evaluated.

\*\*\* Only patients who had undergone treatment were evaluated.

\*\*\*\* Only patients who had COVID-19 + individuals in close proximity were evaluated.
